# Supplementary material for: Leptin receptor-expressing neuron Sh2b1 supports sympathetic nervous system and protects against obesity and metabolic disease
Source: PubMed Central journal article supplement (PMC7089966; doi:10.1038/s41467-020-15328-3), 2020-03-23
Supplement: 41467_2020_15328_MOESM1_ESM.pdf [file 41467_2020_15328_MOESM1_ESM.pdf]

**Leptin receptor-expressing neuron Sh2b1 supports sympathetic nervous system and protects against obesity and metabolic disease**

Lin Jiang et al

Supplementary information

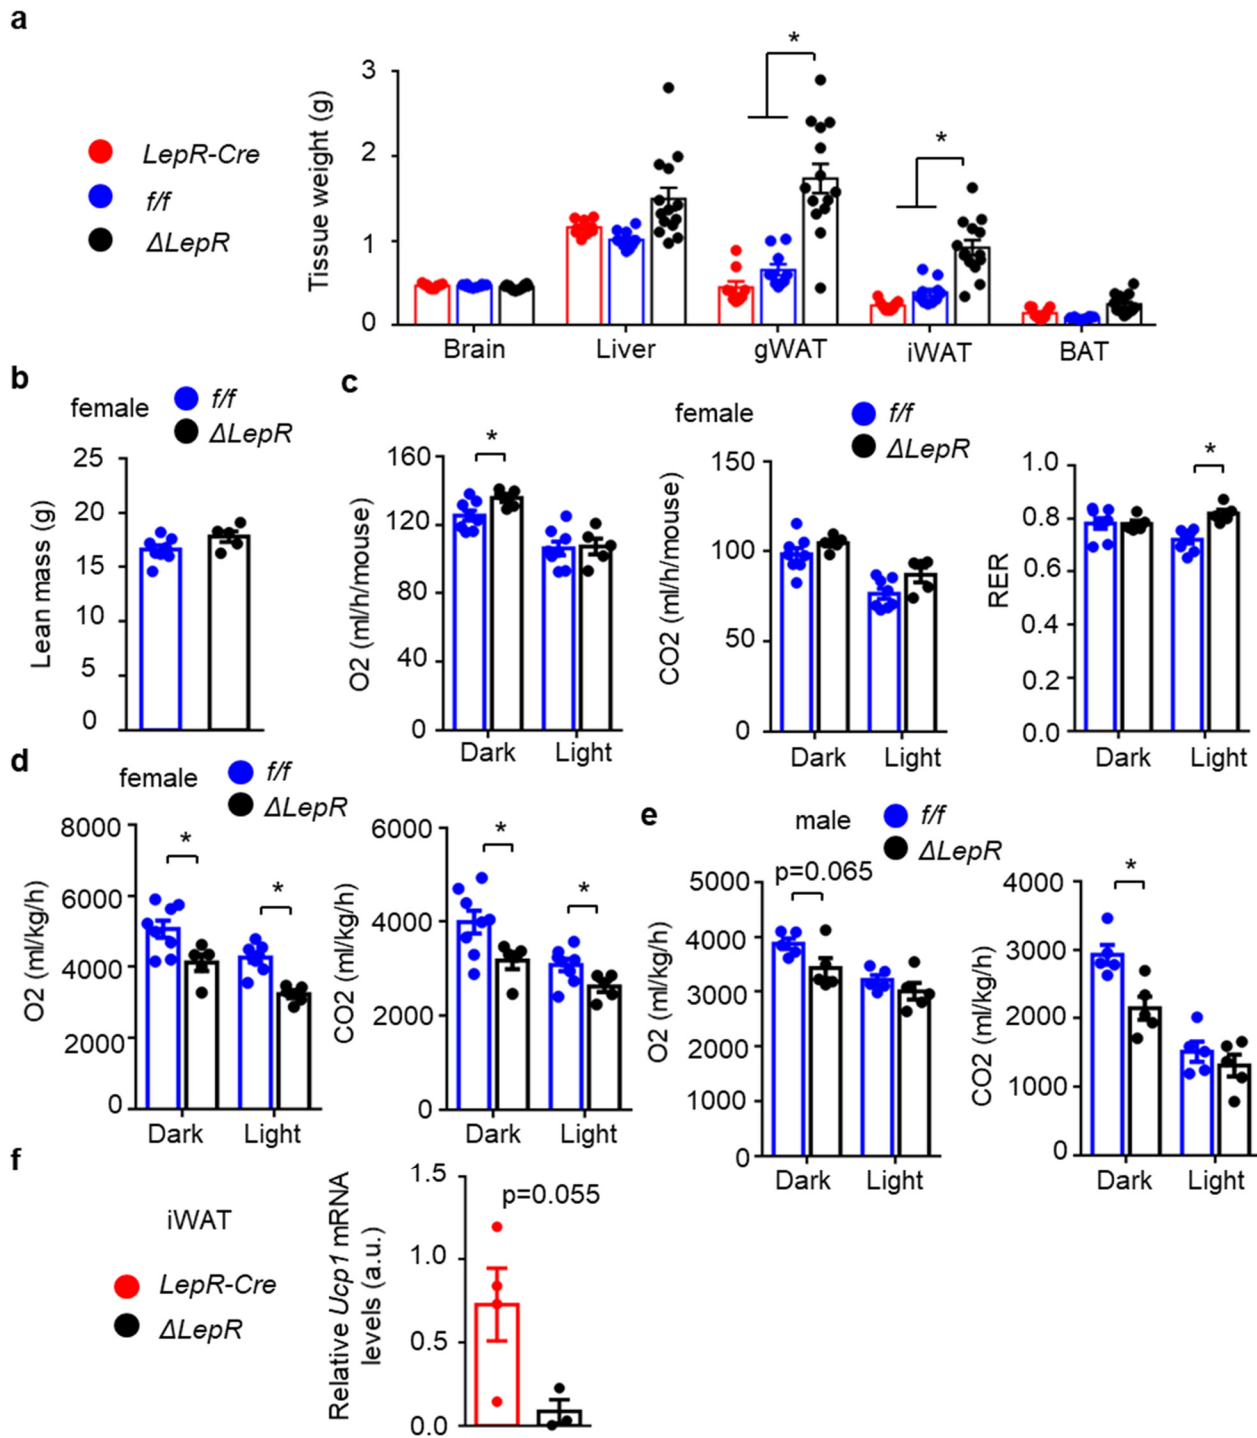

**Supplementary Fig. 1. *Sh2b1* <sup>$\Delta$ LepR</sup> mice develop obesity.** **a** Body compositions of males at 22 weeks of age. *Sh2b1*<sup>*f/f*</sup>: n=10, *LepR-Cre*: n=9, *Sh2b1* <sup>$\Delta$ LepR</sup>: n=14. **b** Female lean mass at 20 weeks of age (by pDexa). *Sh2b1*<sup>*f/f*</sup>: n=8, *Sh2b1* <sup>$\Delta$ LepR</sup>: n=5. **c-d** O<sub>2</sub> consumption and CO<sub>2</sub> production normalized to mouse (c) or body weight (d) in females at 10 weeks of age (by metabolic cages). Both **c** and **d**: *Sh2b1*<sup>*f/f*</sup>: n=8, *Sh2b1* <sup>$\Delta$ LepR</sup>: n=5. **e** O<sub>2</sub> consumption and CO<sub>2</sub> production (normalized to body weight) in males at 10 weeks of age. *Sh2b1*<sup>*f/f*</sup>: n=5, *Sh2b1* <sup>$\Delta$ LepR</sup>: n=7. **f** *Ucp1* mRNA in iWAT at 22 weeks of age (normalized to 36B4 levels). a.u.: arbitrary units. *LepR-Cre*: n=4, *Sh2b1* <sup>$\Delta$ LepR</sup>: n=3. Data are presented as mean  $\pm$  SEM. \*p<0.05, 1-way ANOVA/Bonferroni posttest (a) or 2-tailed unpaired Student's *t* test (b-f). Source data are provided as a Source Data file.

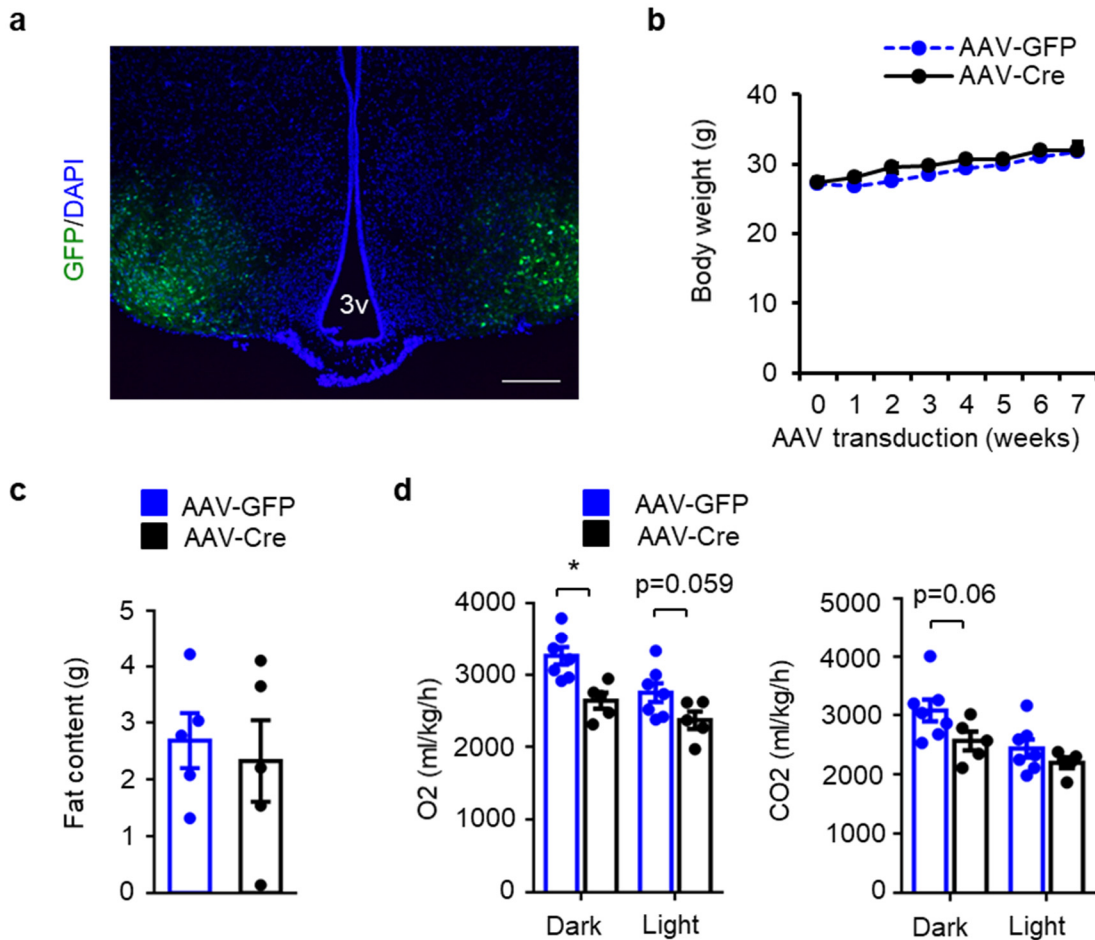

**Supplementary Fig. 2. Hypothalamic expression of Cre does not alter body weight in C57BL/6 mice.** **a** AAV9-CAG-GFP vectors were bilaterally injected into the hypothalamus. Representative hypothalamic sections (3 mice). Scale bar: 200  $\mu$ m. **b-c** AAV1-hSyn-Cre or AAV1-hSyn-GFP vectors were bilaterally injected into the hypothalami of C57BL/6J mice. **b** Growth curves (n=5 per group). **c** Fat content in 7 weeks post AAV transduction (n=5 per group). **d** AAV1-hSyn-Cre (n=5) or AAV1-hSyn-GFP (n=7) vectors were bilaterally injected into the hypothalami of *Sh2b1<sup>ff</sup>* male mice as in Fig 3. O<sub>2</sub> consumption and CO<sub>2</sub> production (normalized to body weight) in 10 weeks post AAV transduction. Data are presented as mean  $\pm$  SEM. \*p<0.05, 2-tailed unpaired Student's *t* test. Source data are provided as a Source Data file.

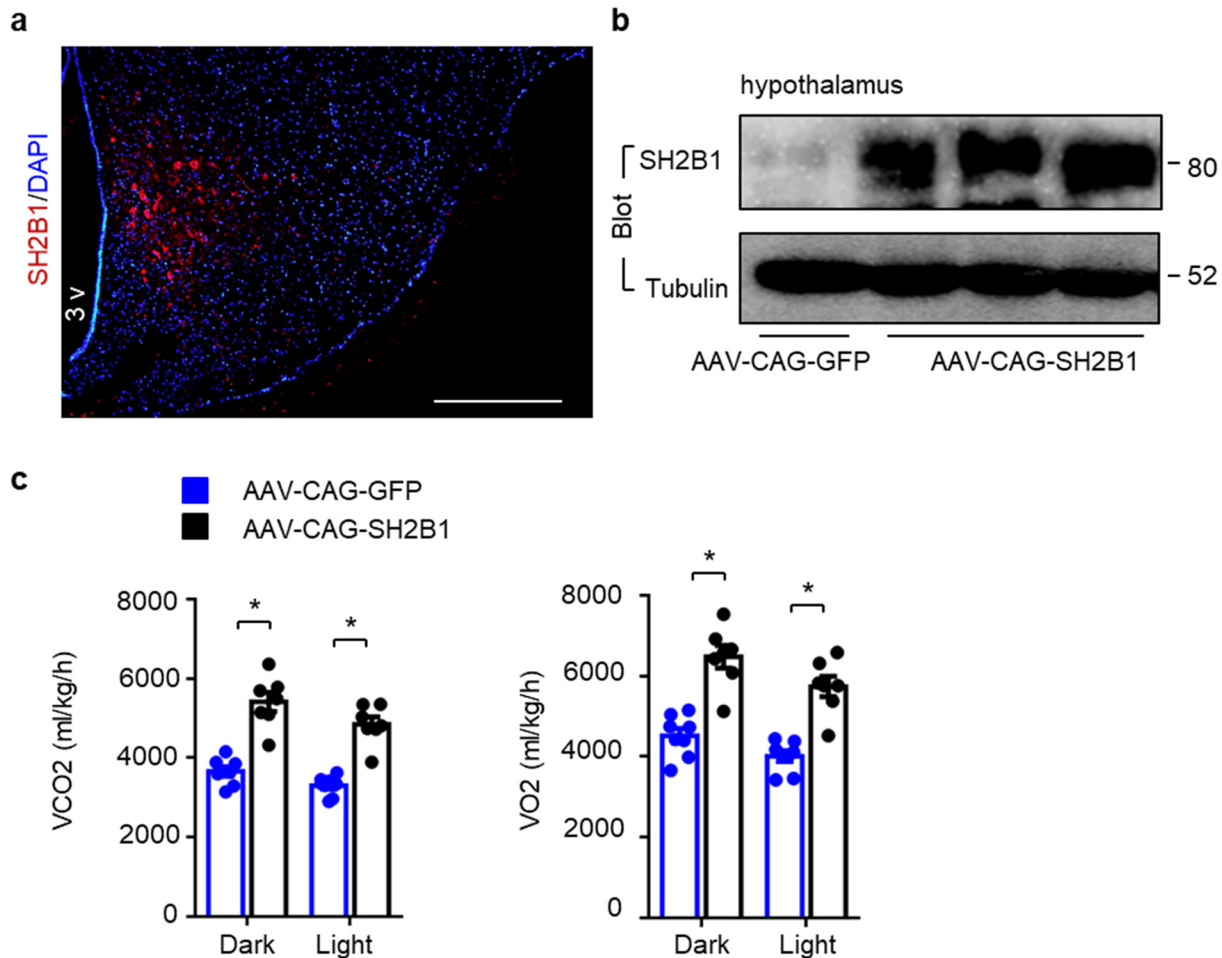

**Supplementary Fig. 3. AAV9-CAG-SH2B1 vector-mediated overexpression of SH2B1 in the hypothalamus.** AAV9-CAG-SH2B1 $\beta$  or AAV9-CAG-GFP vectors were bilaterally injected into the hypothalami of C57BL/6J male mice. **a** Representative hypothalamic sections stained with anti-Sh2b1 antibody (3 mice). Scale bar: 200  $\mu$ m. **b** Hypothalamic extracts were immunoblotted with antibodies against Sh2b1 or  $\alpha$ -tubulin. Each lane represents an individual mouse. **c** AAV vector-transduced mice were fed a HFD for 10 weeks. O<sub>2</sub> consumption and CO<sub>2</sub> production (normalized to body weight) were assessed using metabolic cages. AAV9-CAG-SH2B1 $\beta$ : n=7, AAV9-CAG-GFP: n=8. Data are presented as mean  $\pm$  SEM. \* $p$ <0.05, 2-tailed unpaired Student's  $t$  test. Source data are provided as a Source Data file.

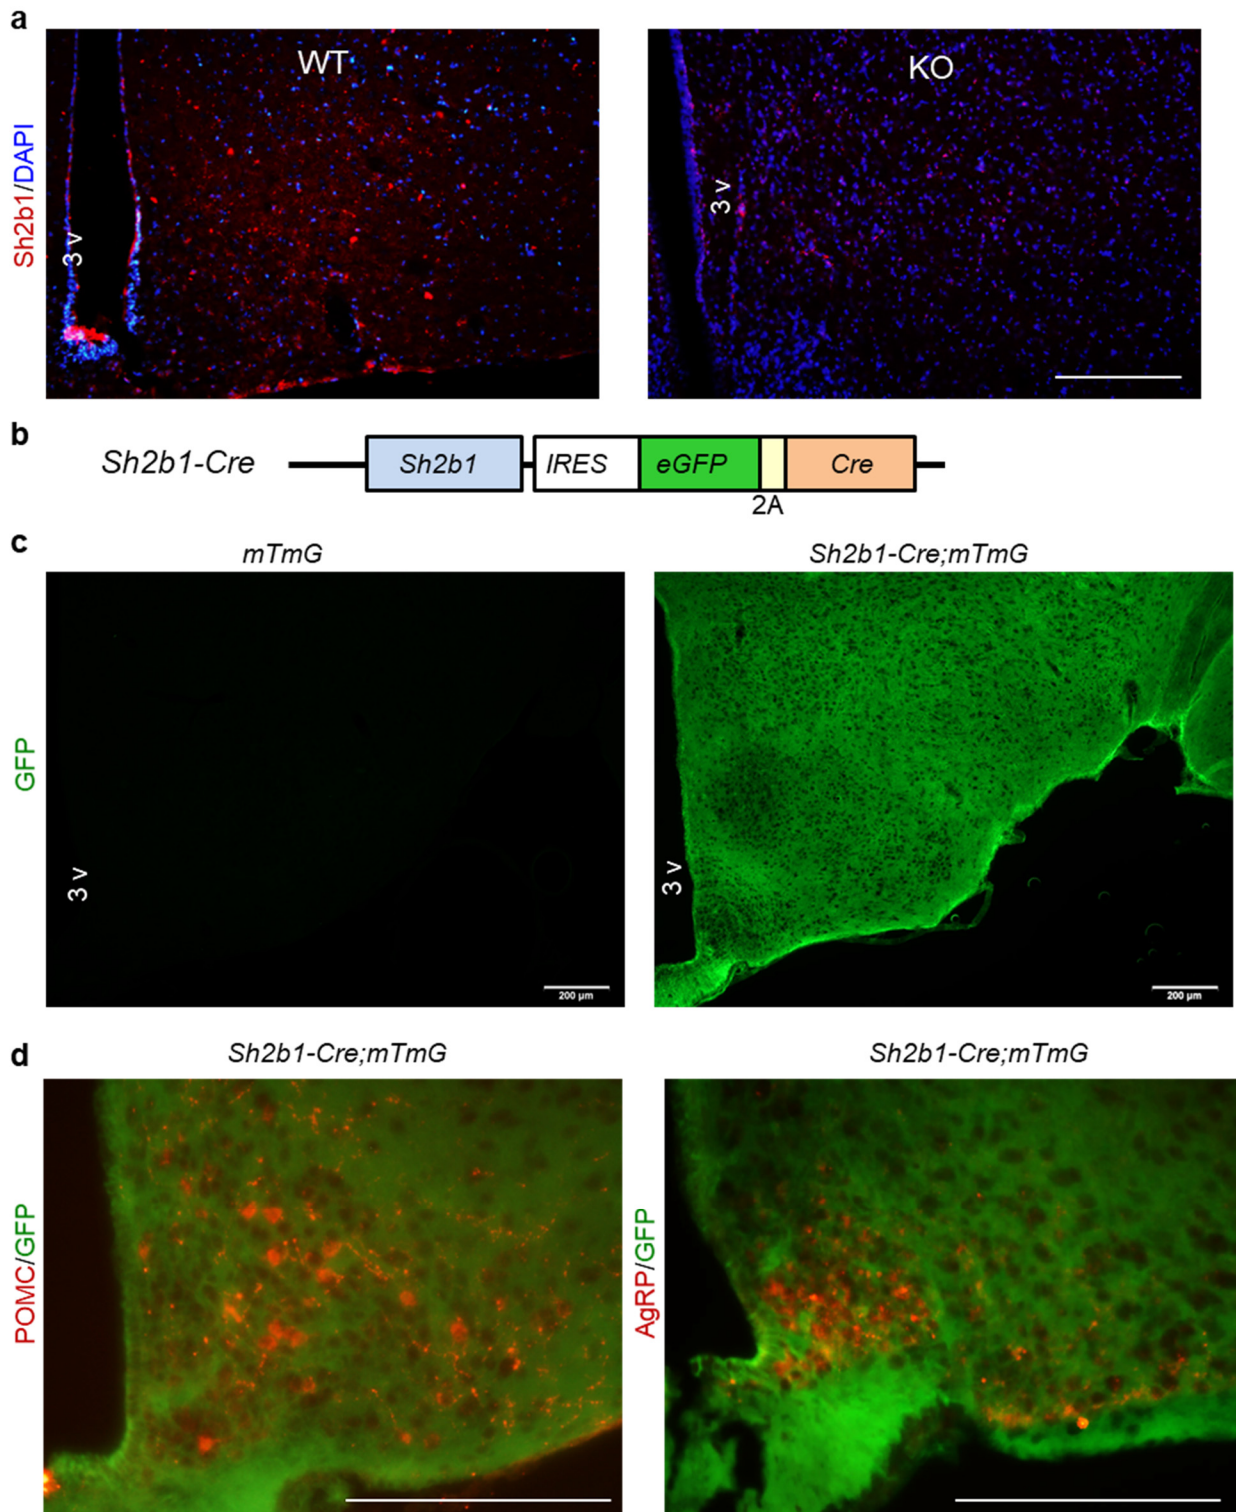

**Supplementary Fig. 4. Sh2b1 neurons in mouse brains.** **a** Representative brain sections (3 pairs). Brain sections were prepared from wild type (WT) and global *Sh2b1* knockout (KO) mice and stained with anti-Sh2b1 antibody. **b** Schematic representation of the *Sh2b1-IRES-eGFP-2A-Cre* allele. **c** Representative brain sections from *mTmG* (negative control, n=3) and *Sh2b1-Cre;mTmG* mice (20x, n=3). **d** Brain sections were prepared from *Sh2b1-Cre;mTmG* mice (n=3) and stained with anti-POMC and anti-AgRP antibodies (40x). Scale bar: 200 μm. Source data are provided as a Source Data file.

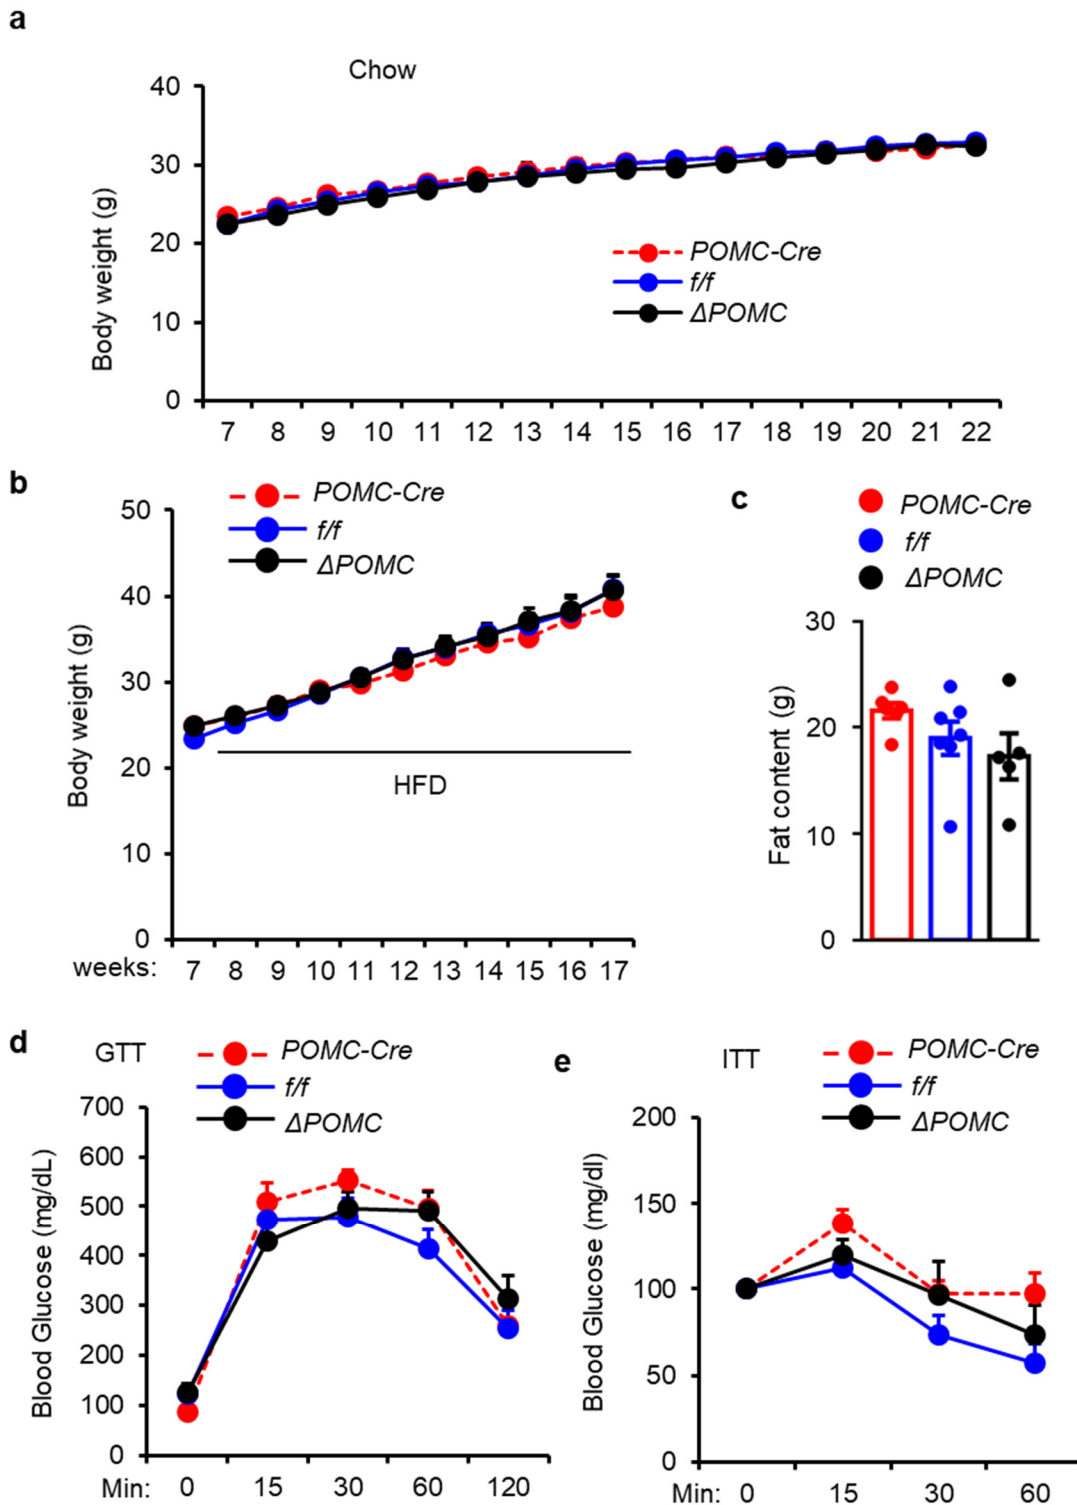

**Supplementary Fig. 5. Deletion of *Sh2b1* in POMC neurons does not alter body weight and glucose metabolism.** Male mice were fed a chow diet (a) or HFD (b-e). **a** Growth curves on chow diet. *Sh2b1* $\Delta$ POMC: n=11, *Sh2b1*<sup>*f/f*</sup>: n=15, *POMC-Cre*: n=11. **b** Growth curves on HFD. *Sh2b1* $\Delta$ POMC: n=15, *Sh2b1*<sup>*f/f*</sup>: n=7, *POMC-Cre*: n=6. **c** Fat content in 15 weeks post HFD feeding. *Sh2b1* $\Delta$ POMC: n=5, *Sh2b1*<sup>*f/f*</sup>: n=7, *POMC-Cre*: n=6. **d-e** GTT and ITT in 15 weeks post HFD feeding. *Sh2b1* $\Delta$ POMC: n=9, *Sh2b1*<sup>*f/f*</sup>: n=9, *POMC-Cre*: n=6. Data are presented as mean  $\pm$  SEM. 1-way (c) or 2-way (a, b, d, e) ANOVA. Source data are provided as a Source Data file.

| ANTIBODY                | SOURCE                                      | Cat#     | lot# | clone# | DILUTION |
|-------------------------|---------------------------------------------|----------|------|--------|----------|
| Ucp-1                   | EMD Millipore                               | 662045   |      |        | 1:10,000 |
| Akt                     | Cell Signaling Technology                   | #4056    |      |        | 1:15,000 |
| Tyrosine hydroxylase    | Cell Signaling Technology                   | sc-14007 |      |        | 1:500    |
| p-HSL (Ser660)          | Cell Signaling Technology                   | 4126     |      |        | 1:2,000  |
| HSL                     | Cell Signaling Technology                   | 4107     |      |        | 1:1,000  |
| c-Fos                   | Cell Signaling Technology                   | 2250     |      |        | 1:1,000  |
| pAkt (pThr308)          | Cell Signaling Technology                   | #4056    |      |        | 1:5,000  |
| pAkt (pSer473)          | Cell Signaling Technology                   | #4060    |      |        | 1:10,000 |
| pStat3 (pTyr705)        | Santa Cruz                                  | sc-8059  |      |        | 1:5,000  |
| Stat3                   | Santa Cruz                                  | sc-8019  |      |        | 1:5,000  |
| $\alpha$ -Tubulin       | Santa Cruz                                  | sc-5286  |      |        | 1:5,000  |
| pHSL (pSer563)          | Cell Signaling Technology                   | 4139     |      |        | 1:100    |
| p85                     | home made                                   | N/A      |      |        | 1:10,000 |
| TuJ1 (beta tubulin III) | Sigma                                       | T8578    |      |        | 1:200    |
| POMC                    | Phoenix Pharmaceuticals, Inc. <sup>57</sup> | H-003-57 |      |        | 1:2000   |
| AgRP                    | Phoenix Pharmaceuticals, Inc.               | H-029-30 |      |        | 1:2000   |
| Sh2b1                   | home made                                   |          |      |        | 1:50     |

**Supplementary Table 1. Antibody list.**
